# Supplementary material
Source: PubMed Central journal article supplement (PMC1924909)
Supplement: NIHMS21644-supplement-01.pdf [file NIHMS21644-supplement-01.pdf]

**Supplementary Figure 1.** LVEC cell proliferation.

**Supplementary Figure 2.** mRNA expression of mature  $\beta$  cell markers and pancreatic transcription factors.

**Supplementary Table 1.** RTPCR amplicon size, cycle number, annealing temperature and primer sequences.

**Supplementary Table 2.** Quantitative RTPCR cycle of threshold (Ct) values. Samples are named by day of RNA harvest and glucose conditions; A, glucose supplemented to 5 mM, B, glucose supplemented to 20 mM.

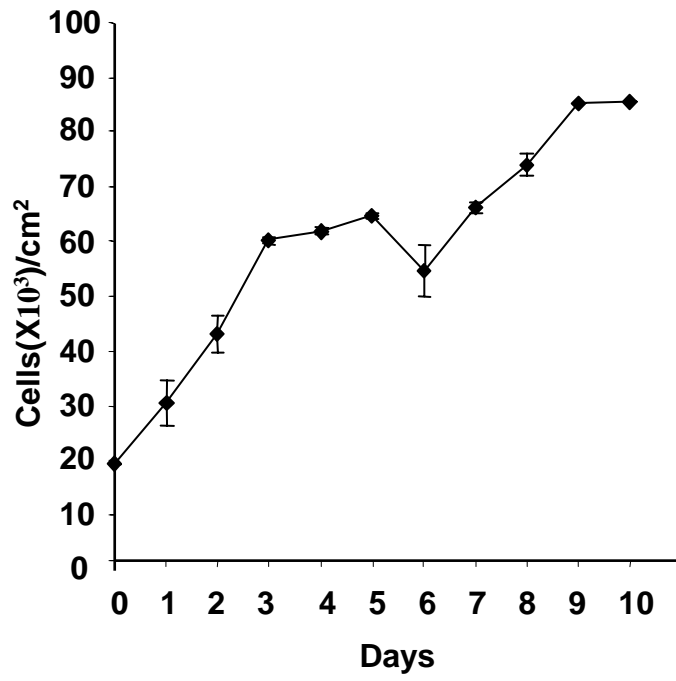

Supplementary Fig. 2

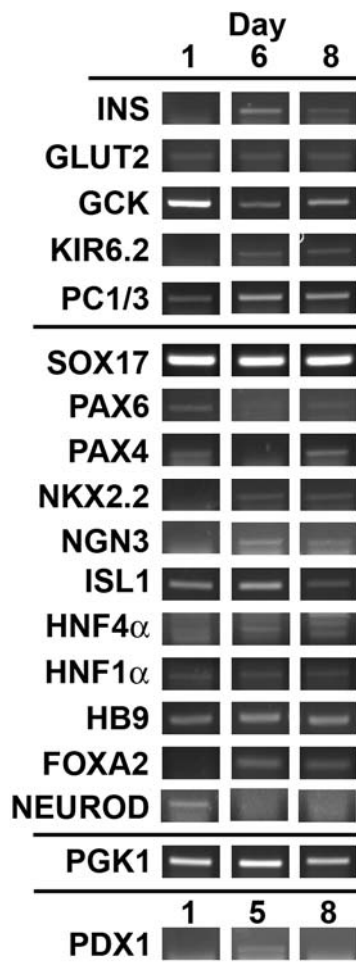

## Supplementary Table 1

| Gene          | Amp. Size (bp) | Cycle # | Ann. Temp. (°C) | Forward Primer           | Reverse Primer           |
|---------------|----------------|---------|-----------------|--------------------------|--------------------------|
| FOXA2         | 160            | 30      | 56              | AGACGGTGTGCAGAGACG       | TTCTTTCCCGTTTTCTCCT      |
| GCK           | 333            | 30      | 56.2            | GCTCACTCAGGACTTTGATGC    | AGCCACTCAGTGATGGTATGG    |
| HLXB9         | 101            | 30      | 56.2            | CGAGACCCAGGTGAAGATTTG    | CCTTCTGTTTTCTCCGCTTCCT   |
| HNF4 $\alpha$ | 245            | 30      | 48.2            | CCCAGTCCCCTAAGAGAGC      | GGATGAAGGTGAAGGTGAAGG    |
| INS           | 368            | 30      | 65              | ATCAGAAGAGGCCATCAAG      | GTTGCAGTAGTTCTCCAGCTG    |
| ISL1          | 330            | 30      | 56              | GAGAGACACGACGGTGGCTTAC   | GCAATGCAAGAGCAAACAAA     |
| KIR6.2        | 110            | 30      | 60              | GAGGAGGACGGACGTTACTCTGT  | TCCAGTAGGCTGTGGTCTCAT    |
| NEUROD1       | 203            | 30      | 50              | TCAGCATCAATGGCAACTTC     | CTCGCTCATGATGTGAATGG     |
| NEUROG3       | 286            | 30      | 65              | AGACGACGCGAAGCTCACC      | AAGCCAGACTGCCTGGGCT      |
| NKX2-2        | 330            | 30      | 60.5            | TGCAGCACATGCAGTACAACG    | TCCCAAGGTTT CAGAAGGAGAGG |
| PAX4          | 214            | 30      | 64              | GTATCTAATGGCTGTGTGAGCAAG | TGGGAGTCTTGTCTGGGTGCA    |
| PAX6          | 211            | 30      | 50              | GAGACTGGCTCCATCAGACC     | CTAGCCAGGTTGCGAAGAAC     |
| PC1/3         | 226            | 30      | 63              | CCCAAGTTGGAATATTCATGC    | ACACTTCACTTGTGCAGACAGG   |
| IPF1          | 269            | 35      | 56              | CCTTTCCCATGGATGAAGTC     | TTGTCTCCTCCTTTTTCCA      |
| PGK1          | 246            | 20      | 60              | CAGTTTGGAGCTCCTGGAAG     | TGCAAATCCAGGGTGCAGTG     |
| GLUT2         | 169            | 30      | 54              | ATTGCGGACTTCTGTGGACCTTA  | ACAGCAGCTTTTGGCCTGTG     |
| SOX17         | 226            | 30      | 60              | GCCAGCTCCGCGGTATATTAC    | CCTCACCCCCCAAACCTGT      |
| HNF1 $\alpha$ | 115            | 30      | 55              | TACACCACTCTGGCAGCCACACT  | CGGTGGGTACATGGTGACAGAAC  |

## Supplementary Table 2

| <b>Sample</b> | <b>Ct</b> |
|---------------|-----------|
| 1A            | 34.701    |
| 1B            | 34.438    |
| 1C            | 40.000    |
| 2A            | 40.000    |
| 2B            | 34.193    |
| 2C            | 34.624    |
| 3A            | 34.887    |
| 3B            | 33.833    |
| 3C            | 40.000    |
| 4A            | 34.751    |
| 4B            | 33.837    |
| 4C            | 34.804    |
| 5A            | 33.064    |
| 5B            | 33.878    |
| 5C            | 33.580    |
| 6A            | 32.061    |
| 6B            | 32.340    |
| 6C            | 32.896    |
| 7A            | 35.603    |
| 7B            | 34.406    |
| 7C            | 34.708    |
| 8A            | 33.355    |
| 8B            | 32.886    |
| 8C            | 31.573    |
| 9A            | 32.909    |
| 9B            | 33.711    |
| 9C            | 34.134    |
| 10A           | 40.000    |
| 10B           | 34.867    |
| 10C           | 35.237    |
